# Supplementary material for: Endophytic Bacillus and Pseudomonas spp. Modulate Apple Shoot Growth, Cellular Redox Balance, and Protein Expression Under in Vitro Conditions
Source: PubMed Central journal article supplement (PMC6032008; doi:10.3389/fpls.2018.00889), 2018-06-28
Supplement: Image_1.pdf [file Image_1.pdf]

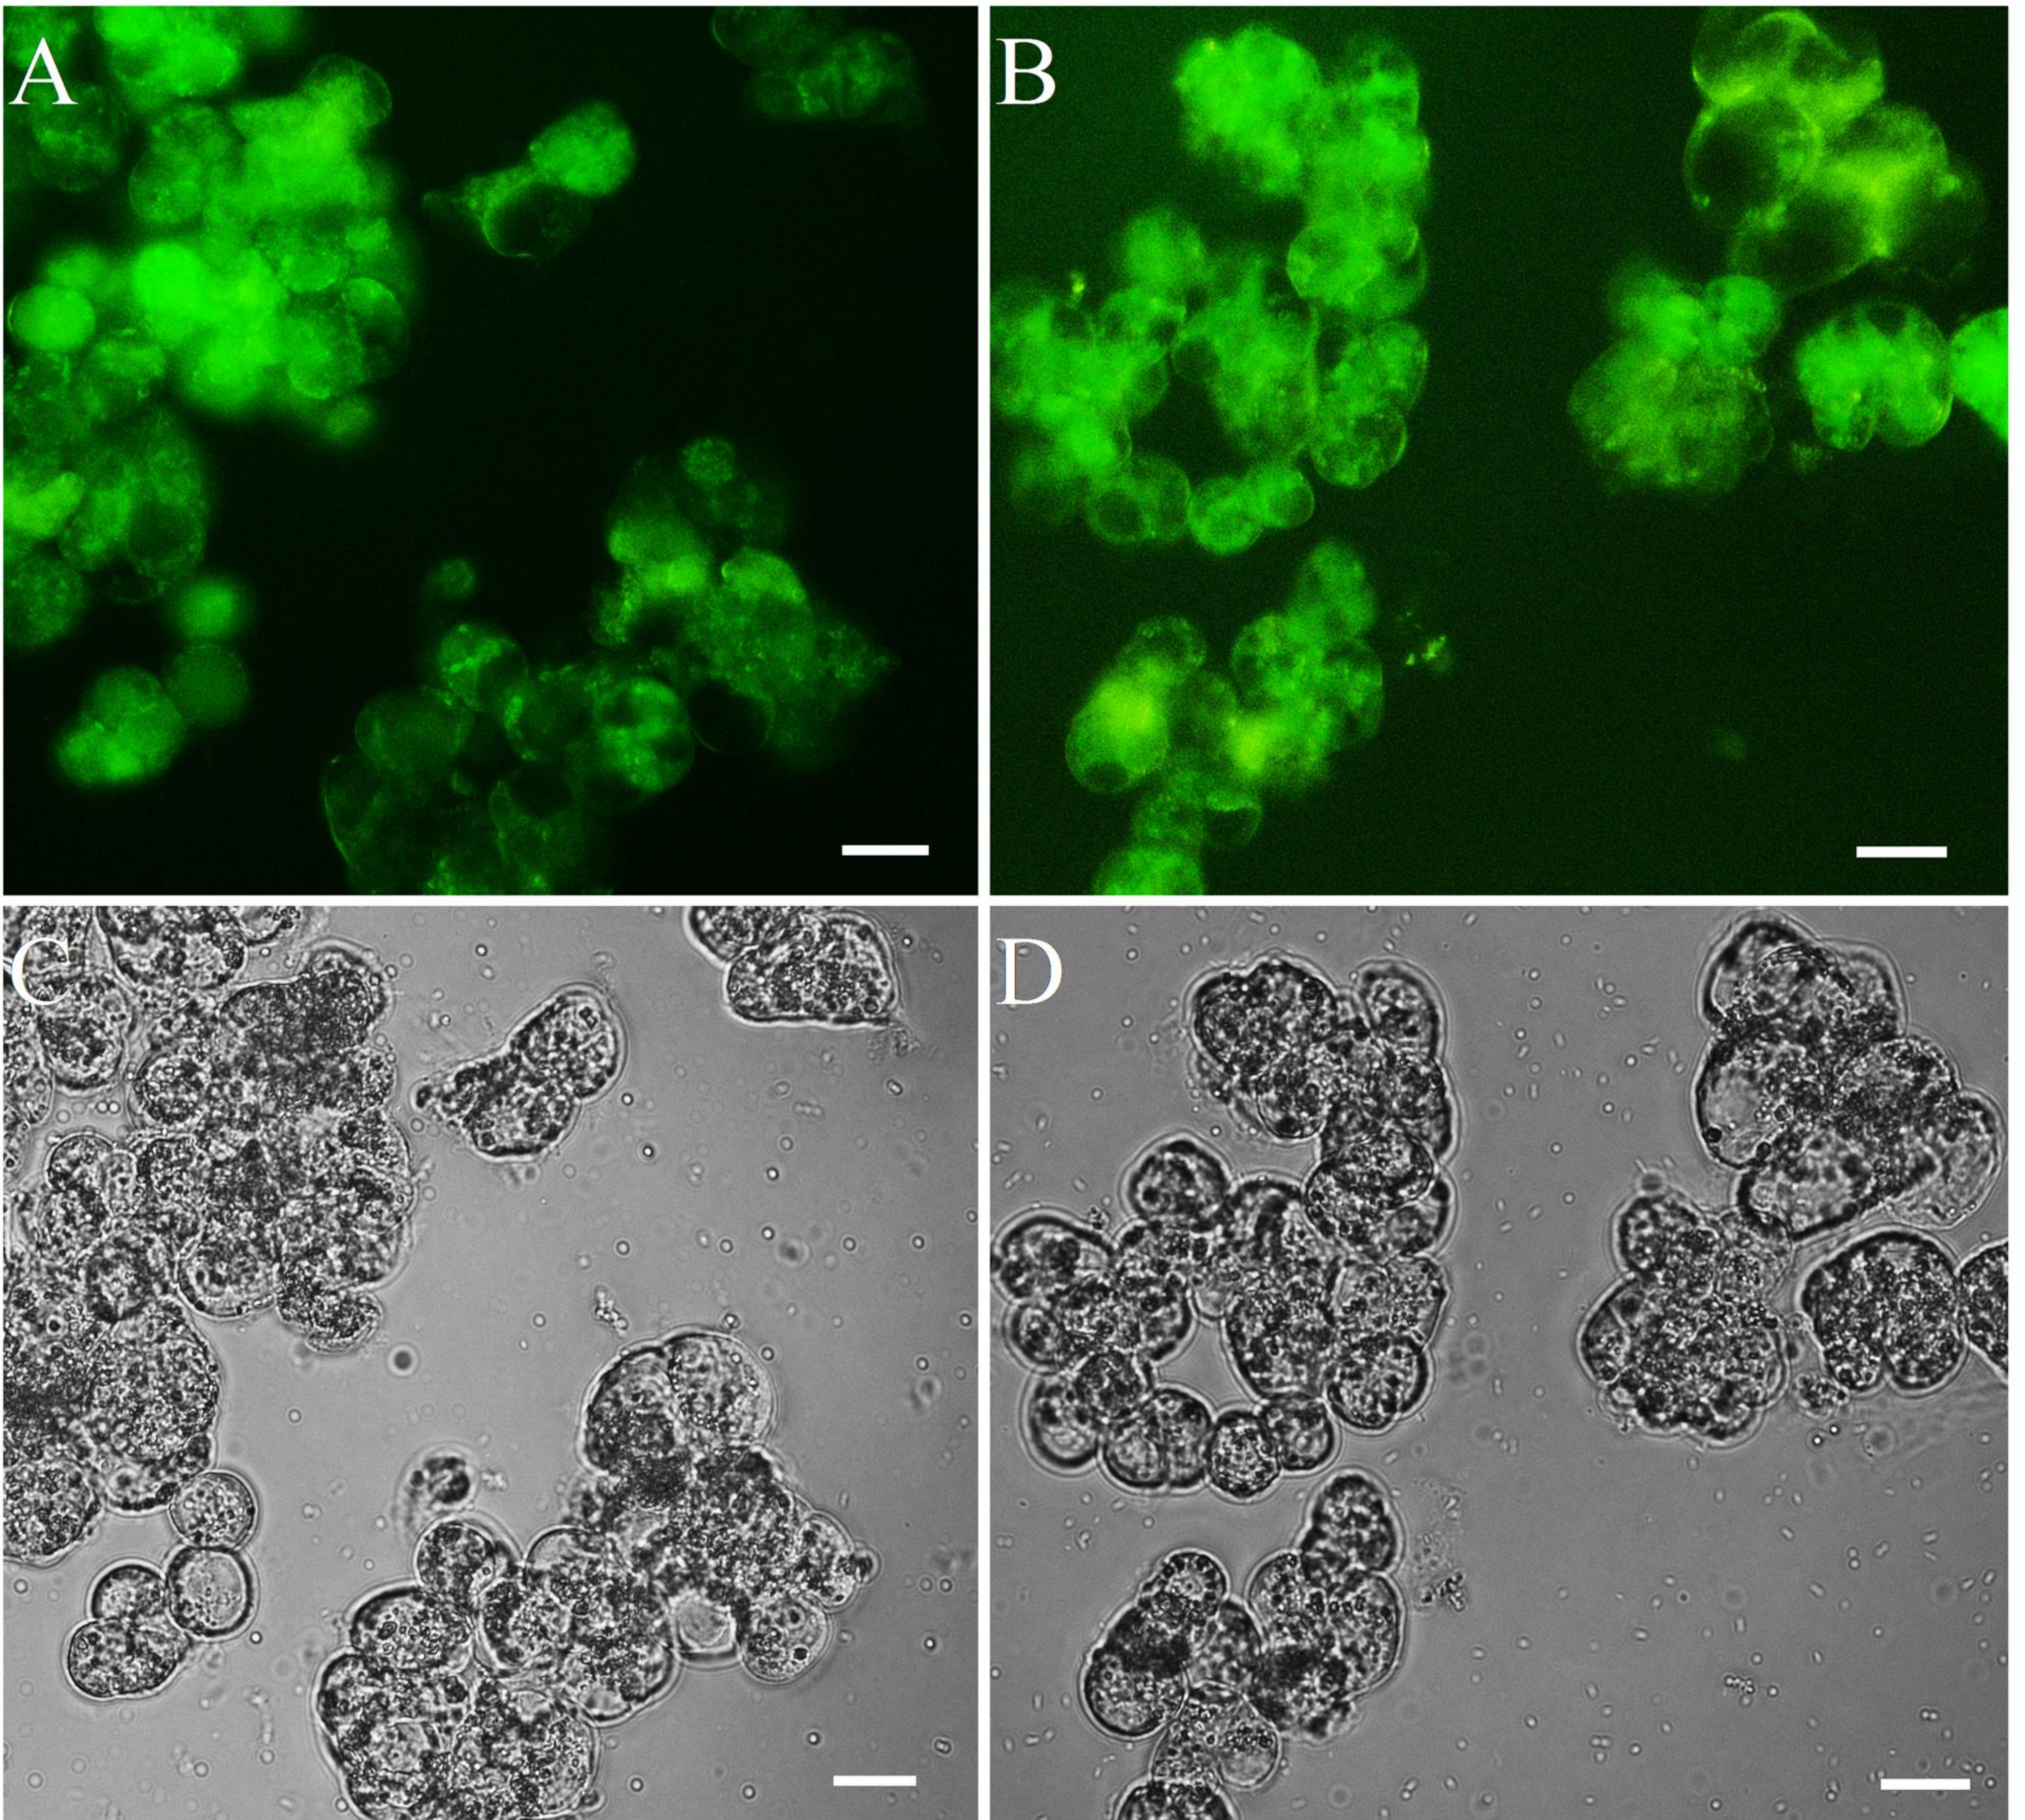

**Supplementary figure 1** Representative images of DCF fluorescence (A, B) and bright-field microscopy of the control (A, C) and *Bacillus* sp. Da\_4 treated (B, D) apple cells. Scale bar is 10 μm.
