# Supplementary material for: Endophytic Bacillus and Pseudomonas spp. Modulate Apple Shoot Growth, Cellular Redox Balance, and Protein Expression Under in Vitro Conditions
Source: PubMed Central journal article supplement (PMC6032008; doi:10.3389/fpls.2018.00889), 2018-06-28
Supplement: Image_2.pdf [file Image_2.pdf]

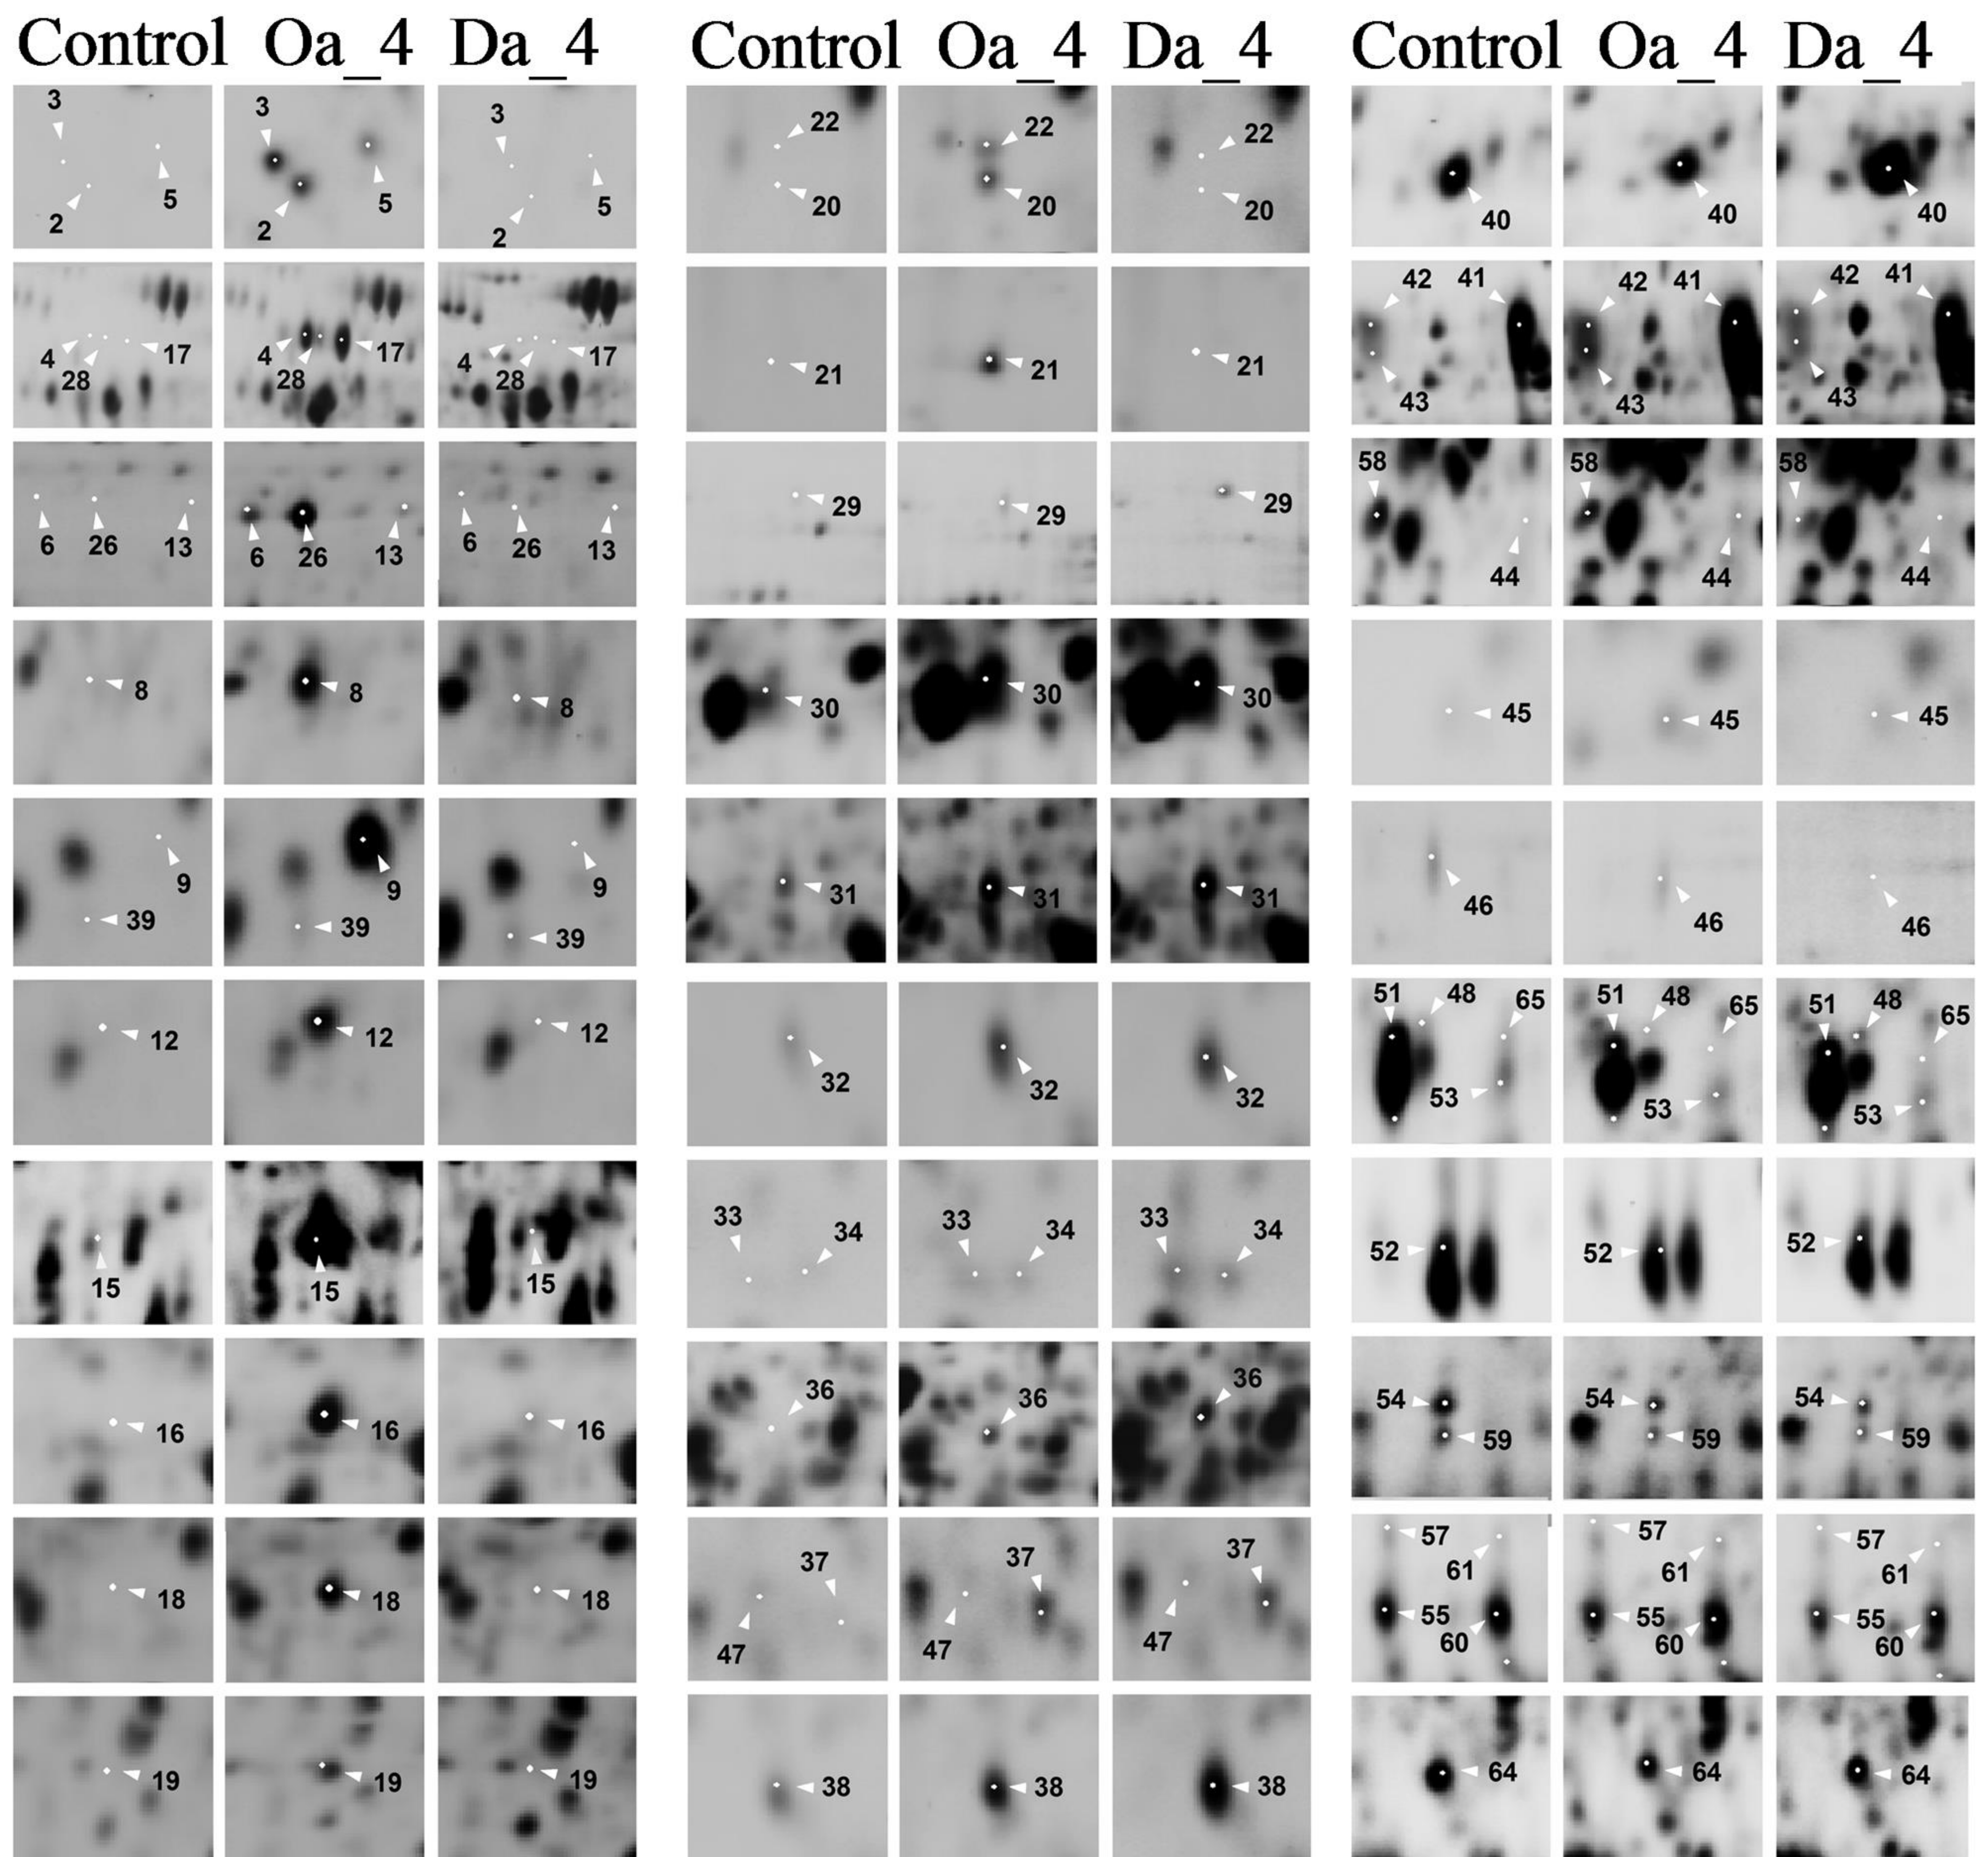

**Supplementary figure 2** Gel spots of 46 identified proteoforms differentially expressed in apple cells co-incubated with *Bacillus* sp. strains Oa\_4 or Da\_4. Representative data of one of the four biological repeats is shown.
