# Supplementary material for: Endophytic Bacillus and Pseudomonas spp. Modulate Apple Shoot Growth, Cellular Redox Balance, and Protein Expression Under in Vitro Conditions
Source: PubMed Central journal article supplement (PMC6032008; doi:10.3389/fpls.2018.00889), 2018-06-28
Supplement: Table_1.pdf [file Table_1.pdf]

**Supplementary Table** Results of identification and annotation of 65 proteoforms differentially expressed in apple cells co-incubated with *Bacillus* sp. strains Da\_4 or Oa\_4.

| Proteoform No. | peptide ID at <i>Malus</i> sp. genome database | Mascot score | Num. of peptides | SC [%] | MW / pI     | NCBI-Protein accession ID | TAIR accession ID | Protein name <sup>1</sup>                              | Protein symbol | Relative abundance <sup>2</sup> |             |         |
|----------------|------------------------------------------------|--------------|------------------|--------|-------------|---------------------------|-------------------|--------------------------------------------------------|----------------|---------------------------------|-------------|---------|
|                |                                                |              |                  |        |             |                           |                   |                                                        |                | Oa4/control                     | Da4/control | Da4/Oa4 |
| 2              | MDP0000248778                                  | 744          | 6                | 40.2   | 20.7 / 8.3  | XP_008365068.1            | AT3G20390.1       | reactive intermediate deaminase                        | RidA           | 13.7                            | 1.5         | -9.1    |
| 3              | MDP0000295540                                  | 587          | 6                | 49.7   | 17.6 / 5.7  | XP_008360260.1            | AT1G24020.2       | major latex protein - like protein 423 (PR-10)         | MLP423         | 13.8                            |             | -90.2   |
| 4              | MDP0000322220                                  | 599          | 9                | 10.5   | 118.9 / 5.9 | XP_009374678.1            | AT5G02500.1       | heat shock cognate protein 70-1                        | HSC70-1        | 58.2                            |             | -33.4   |
| 5              | MDP0000750556                                  | 450          | 6                | 49.7   | 17.5 / 5.5  | XP_008351173.1            | AT1G24020.2       | major latex protein - like protein 423 (PR-10)         | MLP423         | 19.3                            | 2.6         | -7.4    |
| 6              | MDP0000202700                                  | 642          | 12               | 18.4   | 94.1 / 5.2  | XP_008359586.1            | AT3G53230.1       | cell division cycle 48 homolog                         | CDC48B         | 11.9                            |             | -9.2    |
| 8              | MDP0000182066                                  | 785          | 13               | 51.8   | 29.9 / 5.9  | XP_008369843.1            | AT3G53580.1       | diaminopimelate epimerase                              | DAPF           | 8.0                             |             | -6.8    |
| 9              | MDP0000399295                                  | 238          | 3                | 20.7   | 20.7 / 5.1  | XP_009339735.1            | AT4G39730.1       | lipoxygenase homology domain-containing 1-like         | PLAT1          | 69.0                            |             | -52.2   |
| 12             | MDP0000879487                                  | 804          | 11               | 51.9   | 32.1 / 5.2  | XP_008380295.1            | AT4G26900.1       | imidazole glycerol phosphate synthase                  | His-HF         | 7.9                             |             | -7.4    |
| 13             | MDP0000255806                                  | 203          | 6                | 8.5    | 119.5 / 6.9 | XP_008392716.1            | AT5G50920.1       | ATP-dependent Clp protease ATP-binding subunit homolog | CLPC1          | 3.3                             |             | -3.3    |

| Proteo-<br>form<br>No. | peptide ID at<br><i>Malus</i> sp.<br>genome database | Mascot<br>score | Num.<br>of pep-<br>tides | SC<br>[%] | MW<br>/ pI     | NCBI-Protein<br>accession ID     | TAIR<br>accession ID | Protein name <sup>1</sup>                              | Protein<br>symbol | Relative abundance <sup>2</sup> |                 |             |
|------------------------|------------------------------------------------------|-----------------|--------------------------|-----------|----------------|----------------------------------|----------------------|--------------------------------------------------------|-------------------|---------------------------------|-----------------|-------------|
|                        |                                                      |                 |                          |           |                |                                  |                      |                                                        |                   | Oa4/<br>control                 | Da4/<br>control | Da4/<br>Oa4 |
| 15                     | MDP0000243576                                        | 510             | 9                        | 30.3      | 40.5 /<br>9.0  | XP_008373517.1                   | AT4G17720.1          | binding partner of<br>ACD11 1-like                     |                   | 10.1                            |                 | -10.5       |
| 16                     | MDP0000183660                                        | 1996            | 17                       | 59.9      | 41.7 /<br>5.3  | XP_008380137.1                   | AT3G12110.1          | actin-11                                               | ACT11             | 17.2                            |                 | -18.5       |
| 17                     | MDP0000322220                                        | 524             | 10                       | 12.3      | 118.9<br>/ 5.9 | XP_009374678.1                   | AT5G02500.1          | heat shock cognate<br>protein 70-1                     | HSC70-<br>1       | 46.4                            |                 | -52.2       |
| 18                     | MDP0000523734                                        | 1613            | 18                       | 52.6      | 47.2 /<br>5.9  | XP_009356341.1                   | AT1G29150.1          | 26S proteasome non-<br>ATPase regulatory<br>subunit 9  | ATS9              | 17.9                            |                 | -19.9       |
| 19                     | MDP0000487384                                        | 1992            | 21                       | 70.6      | 50.3 /<br>4.8  | XP_009337361.1                   | AT5G23860.2          | tubulin beta-1 chain                                   | TUB8              | 6.4                             |                 | -6.4        |
| 20                     | MDP0000697468                                        | 418             | 4                        | 26.5      | 26.6 /<br>6.5  | XP_008369444.1<br>XP_008363792.1 | AT2G43090.1          | isopropylmalate<br>dehydratase small<br>subunit 3-like |                   | 21.8                            |                 | -22.2       |
| 21                     | MDP0000191668                                        | 375             | 7                        | 40.6      | 23.3 /<br>8.7  | XP_009349223.1                   | AT2G35490.1          | plastid-lipid<br>associated protein                    | PAP3              | 15.5                            |                 | -21.1       |
| 22                     | MDP0000697468                                        | 651             | 7                        | 42.3      | 26.6 /<br>6.5  | XP_008369444.1<br>XP_008363792.1 | AT2G43090.1          | isopropylmalate<br>dehydratase small<br>subunit 3-like |                   | 11.1                            |                 | -14.3       |
| 26                     | MDP0000202700                                        | 483             | 9                        | 14.3      | 94.1 /<br>5.2  | XP_008359586.1                   | AT3G53230.1          | cell division cycle 48<br>homolog                      | CDC48B            | 15.8                            |                 | -32.4       |
| 28                     | MDP0000322220                                        | 1320            | 14                       | 17.7      | 118.9<br>/ 5.9 | XP_009374678.1                   | AT5G02500.1          | heat shock cognate<br>protein 70-1                     | HSC70-<br>1       | 14.3                            |                 | -22.5       |
| 29                     | MDP0000614851                                        | 1870            | 16                       | 32.6      | 62.0 /<br>5.1  | XP_008359517.1                   | AT2G28000.1          | 60 kDa chaperonin<br>subunit alpha                     | CPN60A            | 1.5                             | 2.3             |             |
| 30                     | MDP0000122993                                        | 1136            | 17                       | 52.1      | 25.5 /<br>5.4  | XP_008383009.1                   | AT1G78380.1          | glutathione S-<br>transferase TAU 19                   | GSTU19            | 1.5                             | 2.2             |             |

| Proteo-<br>form<br>No. | peptide ID at<br><i>Malus</i> sp.<br>genome database | Mascot<br>score | Num.<br>of pep-<br>tides | SC<br>[%] | MW<br>/ pI   | NCBI-Protein<br>accession ID | TAIR<br>accession ID | Protein name <sup>1</sup>                          | Protein<br>symbol | Relative abundance <sup>2</sup> |                 |             |
|------------------------|------------------------------------------------------|-----------------|--------------------------|-----------|--------------|------------------------------|----------------------|----------------------------------------------------|-------------------|---------------------------------|-----------------|-------------|
|                        |                                                      |                 |                          |           |              |                              |                      |                                                    |                   | Oa4/<br>control                 | Da4/<br>control | Da4/<br>Oa4 |
| 31                     | MDP0000479113                                        | 2709            | 28                       | 79.7      | 39.8/<br>5.8 | XP_008347272.1               | AT5G54160.1          | O-methyltransferase 1                              | OMT1              | 1.5                             | 2.0             | 1.4         |
| 32                     | MDP0000248778                                        | 837             | 8                        | 50.5      | 20.7/<br>8.3 | XP_008365068.1               | AT3G20390.1          | reactive intermediate<br>deaminase                 | RidA              |                                 | 2.6             |             |
| 33                     | MDP0000141893                                        | 157             | 2                        | 16.2      | 17.2/<br>5.8 | XP_008387172.1               | AT1G31340.1          | ubiquitin-related<br>protein 1                     | RUB1              | 1.7                             | 2.4             |             |
| 34                     | MDP0000141893                                        | 279             | 4                        | 30.5      | 17.2/<br>5.8 | XP_008387172.1               | AT1G31340.1          | ubiquitin-related<br>protein 1                     | RUB1              | 1.6                             | 2.4             |             |
| 36                     | MDP0000208899                                        | 2521            | 18                       | 59.7      | 43.0/<br>5.4 | XP_008354921.1               | AT5G13930.1          | chalcone synthase                                  | CHS               | 3.6                             | 3.6             |             |
| 37                     | MDP0000289300                                        | 1525            | 12                       | 43.8      | 26.7/<br>6.1 | XP_008360355.1               | AT5G22580.1          | stress-response AB<br>barrel domain-<br>containing |                   | 2.5                             | 3.1             |             |
| 38                     | MDP0000942516                                        | 1283            | 9                        | 68.6      | 17.5/<br>5.6 | NP_001281292.1               |                      | major allergen Pru av<br>1-like (PR-10)            |                   | 2.0                             | 1.6             |             |
| 39                     | MDP0000323561                                        | 522             | 7                        | 57.0      | 14.4/<br>4.5 | XP_008391761.1               | AT2G27720.1          | 60S acidic ribosomal<br>P2-2-like                  | RPP2A             | 2.2                             | 1.9             |             |
| 40                     | MDP0000188674                                        | 1545            | 12                       | 58.0      | 25.8/<br>5.1 | XP_008355647.1               | AT5G02790.1          | glutathione S-<br>transferase L3-like              | GSTL3             | -1.4                            | 1.4             | 2.0         |
| 41                     | MDP0000316310                                        | 2679            | 26                       | 55.6      | 48.4/<br>5.7 | XP_008350012.1               | AT1G78860.1          | curculin-like lectin<br>family protein             |                   |                                 | -3.2            |             |
| 42                     | MDP0000316310                                        | 2557            | 27                       | 57.9      | 48.4/<br>5.7 | XP_008350012.1               | AT1G78860.1          | curculin-like lectin<br>family protein             |                   |                                 | -3.0            |             |
| 44                     | MDP0000318079                                        | 238             | 6                        | 31.3      | 23.8/<br>5.1 | XP_008386290.1               | AT1G17860.1          | Kunitz family trypsin<br>and protease inhibitor    | KTI2              |                                 | -2.4            |             |
| 45                     | MDP0000471879                                        | 216             | 5                        | 32.3      | 17.6/<br>6.4 | XP_008391169.1               | AT2G38870.1          | serine protease<br>inhibitor                       |                   | 1.4                             | -1.8            | -2.5        |

| Proteo-<br>form<br>No. | peptide ID at<br><i>Malus</i> sp.<br>genome database | Mascot<br>score | Num.<br>of pep-<br>tides | SC<br>[%] | MW<br>/ pI   | NCBI-Protein<br>accession ID     | TAIR<br>accession ID | Protein name <sup>1</sup>                           | Protein<br>symbol | Relative abundance <sup>2</sup> |                 |             |
|------------------------|------------------------------------------------------|-----------------|--------------------------|-----------|--------------|----------------------------------|----------------------|-----------------------------------------------------|-------------------|---------------------------------|-----------------|-------------|
|                        |                                                      |                 |                          |           |              |                                  |                      |                                                     |                   | Oa4/<br>control                 | Da4/<br>control | Da4/<br>Oa4 |
| 46                     | MDP0000448302                                        | 637             | 6                        | 15.9      | 41.2/<br>5.0 | XP_008363339.1                   | AT5G06720.1          | peroksidase A2                                      | PA2               | -2.1                            | -2.8            |             |
| 47                     | MDP0000157737                                        | 259             | 4                        | 11.1      | 41.7/<br>5.3 | XP_008354115.1<br>XP_008354116.1 | AT3G12110.1          | aktinas-11                                          | ACT11             |                                 | -2.0            |             |
| 50                     | MDP0000737474                                        | 593             | 7                        | 68.6      | 16.1/<br>5.2 |                                  |                      |                                                     |                   |                                 | -2.9            |             |
| 51                     | MDP0000326576                                        | 1993            | 7                        | 40.7      | 22.9/<br>4.7 | XP_008386290.1                   | AT1G17860.1          | Kunitz family trypsin<br>and protease inhibitor     | KTI2              |                                 | -2.7            |             |
| 52                     | MDP0000942516                                        | 1544            | 12                       | 77.4      | 17.5/<br>5.6 | NP_001281292.1                   |                      | major allergen Pru av<br>1-like (PR-10)             |                   |                                 | -2.6            |             |
| 53                     | MDP0000326576                                        | 1079            | 6                        | 40.7      | 22.9/<br>4.7 | XP_008386290.1                   | AT1G17860.1          | Kunitz family trypsin<br>and protease inhibitor     | KTI2              | <i>-1.8</i>                     | -2.8            |             |
| 55                     | MDP0000218699                                        | 397             | 6                        | 42.3      | 25.9/<br>4.7 | XP_008365751.1                   | AT1G20030.2          | thaumatin family<br>protein (PR-5)                  | TLP               |                                 | -2.6            |             |
| 58                     | MDP0000764121                                        | 1103            | 9                        | 42.7      | 38.9/<br>6.0 | XP_008337854.1                   | AT3G45310.1          | thiol protease<br>aleurain-like                     |                   |                                 | -3.1            |             |
| 59                     | MDP0000570395                                        | 1296            | 10                       | 32.2      | 55.3/<br>6.1 | XP_008366411.1                   | AT4G16260.1          | glucan endo-1-3-beta-<br>glucosidase-like           |                   |                                 | -2.8            |             |
| 60                     | MDP0000218699                                        | 414             | 3                        | 13.7      | 25.9/<br>4.7 | XP_008365751.1                   | AT1G20030.2          | thaumatin family<br>protein (PR-5)                  | TLP               |                                 | -2.7            |             |
| 61                     | MDP0000153963                                        | 719             | 8                        | 41.9      | 29.5/<br>4.6 | XP_008384871.1                   | AT2G29570.1          | proliferating cell<br>nuclear antigen 2             | PCNA2             |                                 | -2.7            | -2.1        |
| 64                     | MDP0000201559                                        | 1578            | 15                       | 62.6      | 23.4/<br>5.2 | XP_008371940.1<br>XP_008371938.1 | AT4G20260.6          | plasma membrane-<br>associated cation-<br>binding 1 | PCAP1             | -2.1                            | -2.3            |             |

<sup>1</sup>Name of *A. thaliana* homologue is presented; where *A. thaliana* homologue is not available, protein name assigned in NCBI Protein database is used. <sup>2</sup>Mean values of statistically significant differences of relative abundance between indicated experimental groups; difference value that is lower than 2-fold are indicated in italic. Abbreviations: SC – sequence coverage; MW – molecular weight; pI – isoelectric point.
